# Supplementary material for: Automatic Detection of Slow Conducting Channels during Substrate Ablation of Scar-Related Ventricular Arrhythmias
Source: Hindawi journal article supplement (doi:10.1155/2020/4386841), 2020-05-29
Supplement: f1 [file 4386841.f1.pdf]

553

554

**SUPPLEMENTARY MATERIALS**

555

556 **SUPPLEMENTARY TABLES**

557 **Supplementary table 1.** Lin’s Concordance Correlation factor on the number of SCC entrances identified between mapping modalities (rows against  
 558 columns) from the analysis of the colour-coded maps.

|                      |                                      | <b>vs. EAM screening</b> | <b>vs .SCC-Maps</b> | <b>vs. Ce-CMR PSI Maps</b> |
|----------------------|--------------------------------------|--------------------------|---------------------|----------------------------|
| <b>EAM standard</b>  | <b>Entire population</b><br>(n = 20) | 0.323*                   | 0.227*              | N/A                        |
|                      | <b>Ischemic</b><br>(n = 10)          | 0.366*                   | 0.156*              | 0.212*                     |
|                      | <b>ARVD/C</b><br>(n = 10)            | 0.047*                   | 0.023*              | N/A                        |
| <b>EAM screening</b> | <b>Entire population</b><br>(n = 20) | -                        | 0.665*              | N/A                        |
|                      | <b>Ischemic</b><br>(n = 10)          | -                        | 0.528*              | 0.679*                     |
|                      | <b>ARVD/C</b><br>(n = 10)            | -                        | 0.877*              | N/A                        |

|                 |                                             |   |   |        |
|-----------------|---------------------------------------------|---|---|--------|
| <b>SCC-Maps</b> | <b>Entire population</b><br><b>(n = 20)</b> | - | - | N/A    |
|                 | <b>Ischemic</b><br><b>(n = 10)</b>          | - | - | 0.628* |
|                 | <b>ARVD/C</b><br><b>(n = 10)</b>            | - | - | N/A    |

559 \**P*-value < 0.01.

560 *ARVD/C: Arrhythmogenic right ventricular dysplasia/cardiomyopathy; Ce-CMR: Contrast-enhanced cardiac magnetic resonance; EAM: Electroanatomical*

561 *Mapping; N/A: Not applicable; PSI: Pixel signal intensity; SCC: Slow conducting channel.*

562 **Supplementary table 2.** Lin's Concordance Correlation factor on the number of SCC entrances  
 563 identified between EAM standard maps and SCC-Maps from the analysis of EGM-DC and  
 564 identification of f-EGMs.

|                                             | <b>Lin's Concordance Correlation factor</b> |
|---------------------------------------------|---------------------------------------------|
| <b>Entire population</b><br><b>(n = 20)</b> | 0.918*                                      |
| <b>Ischemic</b><br><b>(n = 10)</b>          | 0.871*                                      |
| <b>ARVD/C</b><br><b>(n = 10)</b>            | 0.936*                                      |

565 \**P*-value < 0.01.

566 *ARVD/C: Arrhythmogenic right ventricular dysplasia/cardiomyopathy; EAM: Electroanatomical*  
 567 *Mapping; EGM-DC Electrograms with delayed components; f-EGM: fused electrograms; SCC: Slow*  
 568 *conducting channel*
